# Supplementary material
Source: Research Square preprint supplement (doi:10.21203/rs.3.rs-9171400/v1)
Supplement: Supplementary file 1 [file 52cf8ecee37daa5a0133bdab.docx]

**Single atom iron promotes CS hydrogenation on interstellar grain analogues**

Gerard Pareras

Departament de Química, Universitat Autònoma de Barcelona, 08193 Bellaterra, Catalonia, Spain

*Email: [gerard.pareras@uab.cat](mailto:gerard.pareras@uab.cat)

Contents

[1. Summary of all the computational data 2](#_Toc224823783)

[2. Arrhenius plots 2](#_Toc224823784)

# Summary of all the computational data

**Table S1.** Relative energies (in kJ mol-1) for the first two CS hydrogenations reaction pathway: relative potential energies (ΔE) at the PBEsol-D3(BJ) and B3LYP-D3(BJ)//PBEsol-D3(BJ)levels of theory, relative zero-point energy-corrected energies (ΔU) and Gibbs energies (ΔG) at 200, 400 and 600 K, calculated at the B3LYP-D3(BJ)//PBEsol-D3(BJ) level of theory.

| **System** | **PBEsol-D3(BJ)** |  | **B3LYP-D3(BJ)//PBEsol-D3(BJ)** | | | | |
| --- | --- | --- | --- | --- | --- | --- | --- |
| **∆E** |  | **∆E** | **∆U** | **∆G(200)** | **∆G(400)** | **∆G(600)** |
| A | 0.00 |  | 0.00 | 0.00 | 0.00 | 0.00 | 0.00 |
| B | -165.60 |  | -93.91 | -86.21 | -86.86 | -89.47 | -94.39 |
| C | -509.94 |  | -368.52 | -347.10 | -348.07 | -349.33 | -352.66 |
| TS-CD | -477.24 |  | -350.96 | -344.21 | -345.58 | -347.76 | -350.79 |
| D | -595.83 |  | -364.14 | -345.62 | -340.49 | -340.25 | -342.27 |
| TS-DE | -542.77 |  | -359.54 | -343.14 | -342.97 | -344.32 | -347.77 |
| E | -679.26 |  | -516.07 | -480.14 | -478.39 | -475.10 | -473.44 |

**Table S2.** Relative energies (in kJ mol-1) for the second two CS hydrogenations reaction pathway: relative potential energies (ΔE) at the PBEsol-D3(BJ) and B3LYP-D3(BJ)//PBEsol-D3(BJ)levels of theory, relative zero-point energy-corrected energies (ΔU) and Gibbs energies (ΔG) at 200, 400 and 600 K, calculated at the B3LYP-D3(BJ)//PBEsol-D3(BJ) level of theory.

| **System** | **PBEsol-D3(BJ)** |  | **B3LYP-D3(BJ)//PBEsol-D3(BJ)** | | | | |
| --- | --- | --- | --- | --- | --- | --- | --- |
| **∆E** |  | **∆E** | **∆U** | **∆G(200)** | **∆G(400)** | **∆G(600)** |
| E | 0.00 |  | 0.00 | 0.00 | 0.00 | 0.00 | 0.00 |
| F | -35.82 |  | -10.64 | -5.62 | -3.81 | -3.80 | -5.62 |
| TS-FG | 31.88 |  | 103.73 | 104.50 | 106.38 | 108.60 | 110.55 |
| G | -71.94 |  | -39.32 | -22.15 | -20.02 | -17.75 | -15.92 |
| TS-GH | -2.37 |  | 8.58 | 15.82 | 12.80 | 7.24 | 1.25 |
| H | -55.65 |  | -54.47 | -36.53 | -35.37 | -34.73 | -34.75 |

# Arrhenius plots

**Figure S1.** Arrhenius plot for the first hydrogenation (TS-CD). RRKM constants, without and considering tunnelling, are represented in blue and orange colours, respectively.

**Figure S2.** Arrhenius plot for the second hydrogenation (TS-DE). RRKM constants, without and considering tunnelling, are represented in blue and orange colours, respectively.

**Figure S3.** Arrhenius plot for the third hydrogenation (TS-FG). RRKM constants, without and considering tunnelling, are represented in blue and orange colours, respectively.

**Figure S4.** Arrhenius plot for the fourth hydrogenation (TS-GH). RRKM constants, without and considering tunnelling, are represented in blue and orange colours, respectively.
